# Supplementary material
Source: PubMed Central journal article supplement (PMC5352461)
Supplement: NIHMS853117-supplement-Supp_info.pdf [file NIHMS853117-supplement-Supp_info.pdf]

# Web-based Supplementary Materials for “Identifying Predictive Markers for Personalized Treatment Selection”

by

Yuanyuan Shen and Tianxi Cai

This supplementary material contains the proof of convergence of the proposed test statistics.

## *Convergence of the Proposed Test Statistic*

We can write the statistic in terms of stochastic process:

$$\widehat{Q}_\psi = n^{-1} \widehat{\Delta}^\top \mathbb{K}_n \widehat{\Delta} = \int \int k(\mathbf{x}, \mathbf{x}') d\widehat{\Theta}(\mathbf{x}) d\widehat{\Theta}(\mathbf{x}') \quad (1)$$

where

$$\widehat{\Theta}(\mathbf{x}) = n^{-\frac{1}{2}} \sum_{i=1}^n \frac{(Y_i - \bar{Y}_1) I(T_i = 1)}{\widehat{\pi}_1} I(\mathbf{X}_i \leq \mathbf{x}) - n^{-\frac{1}{2}} \sum_{i=1}^n \frac{(Y_i - \bar{Y}_0) I(T_i = 0)}{\widehat{\pi}_0} I(\mathbf{X}_i \leq \mathbf{x}). \quad (2)$$

To derive the influence function of  $\widehat{\Theta}(\mathbf{x})$ , we write the first part of  $\widehat{\Theta}(\mathbf{x})$  in the following way:

$$\begin{aligned} & n^{-\frac{1}{2}} \sum_{i=1}^n \frac{(Y_i - \bar{Y}_1) I(T_i = 1)}{\widehat{\pi}_1} I(\mathbf{X}_i \leq \mathbf{x}) \\ &= n^{-\frac{1}{2}} \sum_{i=1}^n \frac{(Y_i - \mu_1) I(T_i = 1)}{\pi_1} \left[ I(\mathbf{X}_i \leq \mathbf{x}) - n^{-1} \sum_{i=1}^n I(T_i = 1) I(\mathbf{X}_i \leq \mathbf{x}) \right] + o_P(1) \\ &= n^{-\frac{1}{2}} \sum_{i=1}^n \frac{(Y_i - \mu_1) I(T_i = 1)}{\pi_1} [I(\mathbf{X}_i \leq \mathbf{x}) - \mathcal{F}(\mathbf{x})] + o_P(1) \end{aligned}$$

where  $\mathcal{F}(\mathbf{x}) = P(\mathbf{X}_i \leq \mathbf{x})$ . Since by a uniform law of large numbers (ULLN) (Pollard, 1990),  $n^{-1} \sum_{i=1}^n \frac{I(T_i=1)I(\mathbf{X}_i \leq \mathbf{x})}{\pi_1}$  converges in probability to its limit,  $\mathcal{F}(\mathbf{x})$ , uniformly in  $\mathbf{x}$ . Therefore,

$$\widehat{\Theta}(\mathbf{x}) = n^{-\frac{1}{2}} \sum_{i=1}^n \theta_i(\mathbf{x}) + o_P(1), \quad (3)$$

where

$$\theta_i = \left[ \frac{(Y_i - \mu_1) I(T_i = 1)}{\pi_1} - \frac{(Y_i - \mu_0) I(T_i = 1)}{\pi_0} \right] [I(\mathbf{X}_i \leq \mathbf{x}) - \mathcal{F}(\mathbf{x})] \quad (4)$$

It is not hard to show that  $E\{\theta_i(\mathbf{x})\} = 0$ . In addition, it follows from a functional central limit theorem (Pollard, 1990) that  $\widehat{\Theta}(\mathbf{x})$  converges jointly to a zero mean Gaussian process  $G(\mathbf{x})$ . By

Lemma A.3 of Biliias et al. (1997) and the strong representation theorem, we have

$$(1) \rightarrow \int \int k(\mathbf{x}, \mathbf{x}') dG(\mathbf{x}) dG(\mathbf{x}')$$

## References

- Biliias, Y., Gu, M., Ying, Z., et al. (1997). Towards a general asymptotic theory for cox model with staggered entry. *The Annals of Statistics* **25**, 662–682.
- Pollard, D. (1990). *Empirical processes: theory and applications*. NSF-CBMS Regional Conference Series in Probability and Statistics 2. Institute of Mathematical Statistics and American Statistical Association.
